# Supplementary material for: Trans-ethnic fine mapping identifies a novel independent locus at the 3′ end of CDKAL1 and novel variants of several susceptibility loci for type 2 diabetes in a Han Chinese population
Source: Springer Nature journal article supplement (doi:10.1007/s00125-013-3047-1), 2013-09-07
Supplement: MOESM8 [file 8091856]

**ESM Table S1. Genotype Quality Control**

| <b>SNPs</b>                               | <b>Removed (n)</b> | <b>Remaining (n)</b> |
|-------------------------------------------|--------------------|----------------------|
|                                           |                    | <b>196,725</b>       |
| Missingness > 2%                          | 30963              | 165,762              |
| Minor allele frequency < 1%; monomorphics | 72211              | 93,551               |
| HWE (P<10E-7)                             | 66                 | 93,485               |
| Heterozygosity > 53%                      | 0                  | 93,485               |
| SNPs in Chr > 22                          | 250                | 93,235               |
| <b>SNPs</b>                               |                    | <b>93,235</b>        |
