# Supplementary material for: Trans-ethnic fine mapping identifies a novel independent locus at the 3′ end of CDKAL1 and novel variants of several susceptibility loci for type 2 diabetes in a Han Chinese population
Source: Springer Nature journal article supplement (doi:10.1007/s00125-013-3047-1), 2013-09-07
Supplement: MOESM9 [file 8091856]

ESM Table S2. Summary of 50 T2D and related trait loci

| Number | Chr | Loci                                   | Reasons for Fine-mapping                                                 | Coverage (number of SNPs) on Metabochip | Confirmation in TaiChi p<10E-3 | Lead SNP (TaiChi) | Literature SNP or Proxy of Literature SNP | r2 (Asian) | r2 (European) |
|--------|-----|----------------------------------------|--------------------------------------------------------------------------|-----------------------------------------|--------------------------------|-------------------|-------------------------------------------|------------|---------------|
| 1      | 2   | <i>GCKR</i>                            | SFM (fastGLU), Replication (fastGLU, 2hrGLU)                             | 157                                     | Yes                            | rs1260326         | rs780094                                  | 0.827      | 0.933         |
| 2      | 2   | <i>IRS1/LOC646736</i>                  | SFM (T2D), Replication (T2D, fastGLU, 2hrGLU, fastINS)                   | 727                                     | Yes                            | rs2943632         | rs1260326                                 | 1.000      | 1.000         |
| 3      | 3   | <i>UBE2E2 *</i>                        | Replication (T2D, fastINS)                                               | 10                                      | Yes                            | rs2943632         | rs7578326                                 | 0.070      | 0.782         |
| 4      | 3   | <i>IGF2BP2</i>                         | LFM (T2D), SFM (T2D), Replication (T2D, fastGLU)                         | 386                                     | Yes                            | rs17012800        | rs2943640                                 | 0.675      | 0.654         |
| 5      | 6   | <i>CDKAL1</i>                          | LFM (T2D), SFM (T2D), Replication (T2D, fastGLU, fastINS)                | 2096                                    | Yes                            | rs6769511         | rs7612463                                 | 0.823      | 0.478         |
|        |     |                                        |                                                                          |                                         |                                | rs6769511         | rs4402960                                 | 0.848      | 1.000         |
|        |     |                                        |                                                                          |                                         |                                | rs6769511         | rs6769511                                 | 1.000      | 1.000         |
|        |     |                                        |                                                                          |                                         |                                | rs9356744         | rs1374910                                 | 0.376      | 0.068         |
|        |     |                                        |                                                                          |                                         |                                | rs9356744         | rs9465871                                 | 0.702      | 0.361         |
|        |     |                                        |                                                                          |                                         |                                | rs9356744         | rs9295474                                 | 0.845      | 0.446         |
|        |     |                                        |                                                                          |                                         |                                | rs9356744         | rs9368222                                 | 1.000      | 0.843         |
|        |     |                                        |                                                                          |                                         |                                | rs9356744         | rs7756992                                 | 0.763      | 0.843         |
|        |     |                                        |                                                                          |                                         |                                | rs9356744         | rs9460546                                 | 0.866      | 0.490         |
| 6      | 8   | <i>SLC30A8</i>                         | SFM (T2D), Replication (T2D, fastGLU, 2hrGLU)                            | 118                                     | Yes                            | rs9356744         | rs9361514                                 | 0.756      | 0.761         |
| 7      | 9   | <i>GLIS3</i>                           | SFM (fastGLU), Replication (T2D, fastGLU, 2hrGLU)                        | 334                                     | Yes                            | rs9356744         | rs4712523                                 | 0.868      | 0.490         |
| 8      | 9   | <i>CDKN2A/B-CDKN2BAS</i>               | LFM (T2D), SFM (T2D), Replication (T2D, fastGLU)                         | 526                                     | Yes                            | rs9356744         | rs4712523                                 | 0.845      | 0.490         |
|        |     |                                        |                                                                          |                                         |                                | rs9356744         | rs9460546                                 | 0.866      | 0.490         |
|        |     |                                        |                                                                          |                                         |                                | rs9356744         | rs9368222                                 | 1.000      | 0.843         |
|        |     |                                        |                                                                          |                                         |                                | rs11774700        | rs13266634                                | 0.934      | 0.801         |
|        |     |                                        |                                                                          |                                         |                                | rs11774700        | rs3802177                                 | 0.956      | 0.801         |
|        |     |                                        |                                                                          |                                         |                                | rs12378556        | rs7034200                                 | NA         | NA            |
|        |     |                                        |                                                                          |                                         |                                | rs12378556        | rs7041847                                 | 0.521      | 0.121         |
|        |     |                                        |                                                                          |                                         |                                | rs10811661        | rs10811661                                | 1.000      | 1.000         |
|        |     |                                        |                                                                          |                                         |                                | rs10811661        | rs10965250                                | 1.000      | 0.915         |
| 9      | 10  | <i>CDC123/CAMK1D</i>                   | SFM (T2D), Replication (T2D, fastGLU)                                    | 417                                     | Yes                            | rs10811661        | rs2383208                                 | 0.977      | 0.957         |
| 10     | 10  | <i>IDE/KIF11/HHEX</i>                  | SFM (T2D), Replication (T2D, fastGLU)                                    | 754                                     | Yes                            | rs10811661        | rs7020996                                 | 0.827      | 0.598         |
| 11     | 11  | <i>KCNQ1 *</i>                         | LFM (T2D), SFM (T2D), Replication (T2D, fastGLU, 2hrGlu)                 | 1762                                    | Yes                            | rs10811661        | rs564398                                  | 0.012      | 0.004         |
|        |     |                                        |                                                                          |                                         |                                | rs11257655        | rs7018475 **                              | NA         | NA            |
|        |     |                                        |                                                                          |                                         |                                | rs11257655        | rs10906115                                | 0.152      | 0.224         |
|        |     |                                        |                                                                          |                                         |                                | rs11257655        | rs12779790 **                             | NA         | NA            |
|        |     |                                        |                                                                          |                                         |                                | rs10882091        | rs1111875                                 | 0.178      | 0.506         |
|        |     |                                        |                                                                          |                                         |                                | rs10882091        | rs6583826 **                              | NA         | NA            |
|        |     |                                        |                                                                          |                                         |                                | rs10882091        | rs1111875                                 | 0.101      | 0.510         |
|        |     |                                        |                                                                          |                                         |                                | rs2237897         | rs2237897                                 | 1.000      | 1.000         |
|        |     |                                        |                                                                          |                                         |                                | rs2237897         | rs7480855                                 | 0.438      | NA            |
| 12     | 11  | <i>KCNJ11/ABCC8</i>                    | SFM (T2D), Replication (T2D)                                             | 89                                      | Yes                            | rs2237897         | rs163182 **                               | NA         | NA            |
| 13     | 15  | <i>PRC1</i>                            | SFM (T2D), Replication (T2D)                                             | 123                                     | Yes                            | rs2237897         | rs2237895 **                              | NA         | NA            |
| 14     | 17  | <i>HNF1B (TCF2)</i>                    | SFM (T2D), Replication (T2D, fastGLU)                                    | 60                                      | Yes                            | rs2237897         | rs2237895 **                              | NA         | NA            |
| 15     | 1   | <i>NOTCH2</i>                          | SFM (T2D), Replication (T2D)                                             | 448                                     | No (P=0.217) †                 | rs2237897         | rs2283228                                 | 0.469      | NA            |
| 16     | 1   | <i>PROX1</i>                           | SFM (fastGLU), Replication (T2D, fastGLU)                                | 163                                     | No (P=0.004) †                 | rs2237897         | rs231362                                  | 0.000      | NA            |
| 17     | 2   | <i>THADA</i>                           | SFM (T2D), Replication (fastGLU)                                         | 866                                     | No (P=0.021) †                 | rs2074314         | rs5219 or rs5215                          | 0.962      | 0.837         |
| 18     | 2   | <i>BCL11A</i>                          | SFM (T2D), Replication (T2D, fastGLU)                                    | 169                                     | No (P=0.020) †                 | rs3743451         | rs8042680 **                              | NA         | NA            |
| 19     | 2   | <i>RBMS1/ITGB6</i>                     | Replication (T2D, fastGLU)                                               | 13                                      | No (P=0.001) †                 | rs8064454         | rs757210                                  | 0.848      | 0.564         |
| 20     | 2   | <i>G6PC2/ABCB11</i>                    | SFM (fastGLU), Replication (fastGLU)                                     | 249                                     | No (P=0.014) †                 | rs8064454         | rs4239217                                 | 0.961      | 0.764         |
| 21     | 3   | <i>PPARG</i>                           | SFM (T2D), Replication (T2D)                                             | 333                                     | No (P=0.006) †                 | rs74117563        | rs2453040                                 | 0.001      | NA            |
| 22     | 3   | <i>ADAMTS9/ADAMTS9-AS2 (LOC730057)</i> | SFM (T2D), Replication (T2D, 2hrGLU)                                     | 179                                     | No (P=0.040) †                 | rs340874          | rs340874                                  | 1.000      | 1.000         |
| 23     | 3   | <i>ADCY5</i>                           | LFM (fastGLU), SFM (T2D, fastGLU), Replication (fastGLU)                 | 871                                     | No (P=0.015) †                 | rs4952986         | rs17030946                                | NA         | 0.001         |
| 24     | 3   | <i>SLC2A2</i>                          | SFM (fastGLU)                                                            | 234                                     | No (P=0.054)                   | rs243018          | rs243083                                  | 0.727      | 0.967         |
| 25     | 4   | <i>WFS1</i>                            | SFM (T2D), Replication (fastGLU)                                         | 280                                     | No (P=0.106)                   | rs6742799         | rs4410242                                 | 0.281      | 0.721         |
| 26     | 5   | <i>ZBED3/ZBED3-AS1 (LOC728723)</i>     | SFM (T2D), Replication (fastGLU)                                         | 55                                      | No (P=0.019) †                 | rs3755160         | rs560887                                  | 0.023      | 0.053         |
| 27     | 7   | <i>DGKB-TMEM195</i>                    | LFM (fastGLU), Replication (fastGLU, 2hrGLU)                             | 2622                                    | No (P=0.005) †                 | rs3755160         | rs563694                                  | 0.025      | 0.053         |
| 28     | 7   | <i>JAZF1</i>                           | LFM (T2D), SFM (T2D), Replication (T2D)                                  | 1235                                    | No (P=0.010) †                 | rs11715234        | rs2197423                                 | 1.000      | 0.342         |
| 29     | 7   | <i>GCK</i>                             | SFM (fastGLU), Replication (T2D, fastGLU, 2hrGLU)                        | 76                                      | No (P=0.104)                   | rs11715234        | rs2067819                                 | 1.000      | 0.131         |
| 30     | 7   | <i>KLF14</i>                           | SFM (T2D), Replication (T2D)                                             | 127                                     | No (P=0.178)                   | rs11715234        | rs2067819                                 | 1.000      | 0.131         |
| 31     | 8   | <i>TP53INP1</i>                        | Replication (T2D, fastGLU)                                               | 5                                       | No (P=0.063)                   | rs5705229         | rs6770866                                 | 0.084      | 0.113         |
| 32     | 9   | <i>PTRPD *</i>                         | Replication (T2D, fastGLU)                                               | 29                                      | No (P=0.003) †                 | rs10511416        | rs11708067                                | 0.001      | 0.000         |
| 33     | 9   | <i>CHCHD9/TLE4</i>                     | Replication (T2D, fastGLU)                                               | 8                                       | No (P=0.065)                   | rs10511416        | rs2877716                                 | 0.001      | 0.007         |
| 34     | 10  | <i>TCF7L2</i>                          | SFM (T2D), Replication (T2D, fastGLU)                                    | 278                                     | No (P=0.010) †                 | rs11924032        | rs11924648                                | 0.066      | 0.285         |
| 35     | 11  | <i>CRY2</i>                            | LFM (fastGLU), SFM (fastGLU), Replication (T2D, fastGLU)                 | 216                                     | No (P=0.010) †                 | rs4689388         | rs4689393                                 | 1.000      | 0.793         |
| 36     | 11  | <i>MADD</i>                            | SFM (fastGLU), Replication (fastGLU)                                     | 172                                     | No (P=0.004) †                 | rs4689388         | rs4689388                                 | 1.000      | 1.000         |
| 37     | 11  | <i>FADS1</i>                           | LFM (fastGLU), SFM (fastGLU), Replication (fastGLU)                      | 37                                      | No (P=0.015) †                 | rs4689388         | rs10012946                                | 0.746      | 0.926         |
| 38     | 11  | <i>CENTD2 (ARAP1)</i>                  | SFM (T2D), Replication (T2D, fastGLU, fastINS)                           | 185                                     | No (P=0.008) †                 | rs7732130         | rs4457053                                 | 0.661      | 0.962         |
| 39     | 11  | <i>MTNR1B</i>                          | SFM (T2D, fastGLU), Replication (T2D, fastGLU)                           | 217                                     | No (P=0.057)                   | rs4719394         | rs2191349                                 | NA         | NA            |
| 40     | 12  | <i>HMG2</i>                            | SFM (T2D), Replication (T2D)                                             | 319                                     | No (P=0.121)                   | rs4722750         | rs1635852                                 | 0.000      | 0.015         |
| 41     | 12  | <i>TSPAN8/LGR5</i>                     | SFM (T2D), Replication (T2D, fastGLU, 2hrGLU)                            | 355                                     | No (P=0.002) †                 | rs4722750         | rs1635852                                 | 0.000      | 0.015         |
| 42     | 12  | <i>IGF1</i>                            | LFM (fastINS), SFM (fastINS), Replication (fastGLU, fastINS)             | 911                                     | No (P=0.012) †                 | rs2268576         | rs2908282                                 | 0.000      | 0.008         |
| 43     | 12  | <i>HNF1A</i>                           | SFM (T2D)                                                                | 49                                      | No (P=0.089)                   | rs2268576         | rs2908289                                 | 0.000      | 0.008         |
| 44     | 13  | <i>SPRY2 *</i>                         | Replication (T2D, fastINS)                                               | 5                                       | No (P=0.021) †                 | rs56988154        | rs13234407                                | 0.071      | 0.091         |
| 45     | 15  | <i>VPS13C/C2CD4A</i>                   | LFM (fastGLU), SFM (2hrGLU), Replication (fastGLU, 2hrGLU, fastINS, T2D) | 611                                     | No (P=0.005) †                 | rs61663478        | rs896854                                  | NA         | NA            |
| 46     | 15  | <i>ZFAND6</i>                          | Replication (T2D, fastGLU)                                               | 5                                       | No (P=0.163)                   | rs10491613        | rs17584499 **                             | NA         | NA            |
| 47     | 16  | <i>FTO</i>                             | Replication (T2D, fastGLU, fastINS)                                      | 1555                                    | No (P=0.003) †                 | rs17791483        | rs13292136 **                             | NA         | NA            |
| 48     | 17  | <i>SREBF1 (RAI1)</i>                   | Replication (T2D)                                                        | 2                                       | No (P=0.264)                   | rs12244851        | rs7903146                                 | NA         | 0.779         |
| 49     | 19  | <i>GIPR</i>                            | LFM (2hrGLU), SFM (2hrGLU), Replication (T2D, 2hrGLU)                    | 104                                     | No (P=0.043) †                 | rs12244851        | rs7901695                                 | NA         | 0.889         |
| 50     | 20  | <i>FITM2-R3HDML-HNF4A</i>              | Replication (T2D, 2hrGLU)                                                | 7                                       | No (P=0.007) †                 | rs12244851        | rs4506565                                 | NA         | 0.889         |
| 51     | 3   | <i>PSMD6 *</i>                         |                                                                          |                                         |                                | rs1554338         | rs11605924                                | 0.026      | 0.054         |
| 52     | 4   | <i>MAEA *</i>                          |                                                                          |                                         |                                | rs74940231        | rs11039182                                | 0.056      | NA            |
| 53     | 6   | <i>ZFAND3 *</i>                        |                                                                          |                                         |                                | rs174550          | rs174550                                  | 1.000      | 1.000         |
| 54     | 6   | <i>KCNK16 *</i>                        |                                                                          |                                         |                                | rs1681503         | rs1552224                                 | 0.019      | 0.001         |
| 55     | 7   | <i>GCC1-PAX4 *</i>                     |                                                                          |                                         |                                | rs4753426         | rs10830963                                | 0.369      | 0.289         |
| 56     | 10  | <i>ADRA2A</i>                          |                                                                          |                                         |                                | rs4753426         | rs1387153                                 | 0.250      | 0.131         |
| 57     | 15  | <i>C2CD4A/4B *</i>                     |                                                                          |                                         |                                | rs1563835         | rs2583921                                 | 0.036      | 0.126         |
| 58     | 17  | <i>SRR *</i>                           |                                                                          |                                         |                                | rs61924003        | rs4760915, proxy for rs4760790            | 0.010      | 0.230         |
| 59     | 19  | <i>PEPD *</i>                          |                                                                          |                                         |                                | rs61924003        | rs4760915, proxy for rs7961581            | 0.010      | 0.230         |
| 60     | X   | <i>DUSP9</i>                           |                                                                          |                                         |                                | rs1111241         | rs35767                                   | 0.008      | NA            |

\* initially discovered in Asian studies; \*\* no proxy  
† (Nominal P-value, for those loci not meeting the P<10E-3); 24 loci with nominal P-value.  
2hrGLU, 2 hour glucose; fastGLU, fasting glucose; fastINS, fasting insulin; LFM, locus fine-mapped; SFM, signal fine-mapped; T2D, type 2 diabetes
