# Supplementary material for: Trans-ethnic fine mapping identifies a novel independent locus at the 3′ end of CDKAL1 and novel variants of several susceptibility loci for type 2 diabetes in a Han Chinese population
Source: Springer Nature journal article supplement (doi:10.1007/s00125-013-3047-1), 2013-09-07
Supplement: MOESM10 [file 8091856]

ESM Table S3. Associations and Direction of Effect

| Chr | Loci                            | Confirmation in TaiChi p<10E-3 | TaiChi         |                                           |    |                      |                         |       |      |       |         |                | Literature                                |    |             |                                     | Direction with TaiChi |
|-----|---------------------------------|--------------------------------|----------------|-------------------------------------------|----|----------------------|-------------------------|-------|------|-------|---------|----------------|-------------------------------------------|----|-------------|-------------------------------------|-----------------------|
|     |                                 |                                | Literature SNP | Literature SNP or proxy of literature SNP | A1 | Frequency A1 (cases) | Frequency A1 (controls) | MAF   | OR   | SE    | P-value | Literature SNP | Literature SNP or proxy of literature SNP | A1 | OR or Beta  | Ethnicity                           |                       |
| 2   | GCCR                            | Yes                            | rs780094       | rs780094                                  | A  | 0.467                | 0.491                   | 0.480 | 0.90 | 0.029 | 2.9E-04 | rs780094       | rs780094                                  | C  | 1.06        | European                            | Same                  |
|     |                                 |                                | rs1260326      | rs1260326                                 | T  | 0.478                | 0.504                   | 0.491 | 0.89 | 0.030 | 9.6E-05 | rs1260326      | rs1260326                                 | T  | 0.07 (Beta) | European and Asian                  | Same                  |
| 2   | IRS1/LOC646736                  | Yes                            | rs7578326      | rs7578326                                 | G  | 0.148                | 0.147                   | 0.148 | 1.01 | 0.041 | 7.5E-01 | rs7578326      | rs7578326                                 | A  | 1.11        | European                            | Different             |
|     |                                 |                                | rs2943641      | rs2943640                                 | T  | 0.065                | 0.078                   | 0.071 | 0.83 | 0.057 | 8.6E-04 | rs2943641      | rs2943640                                 | C  | 1.19        | European                            | Same                  |
| 3   | UBE2E2*                         | Yes                            | rs7612463      | rs7612463                                 | NA | NA                   | NA                      | NA    | NA   | NA    | NA      | rs7612463      | rs7612463                                 | NR | NR          | Japanese, European (same direction) | no proxy or NA        |
|     |                                 |                                | rs4402960      | rs4402960                                 | T  | 0.265                | 0.239                   | 0.251 | 1.15 | 0.034 | 5.6E-05 | rs4402960      | rs4402960                                 | T  | 1.15        | European and Japanese               | Same                  |
| 3   | IGFBP2                          | Yes                            | rs6769511      | rs6769511                                 | C  | 0.277                | 0.247                   | 0.261 | 1.17 | 0.034 | 5.0E-06 | rs6769511      | rs6769511                                 | C  | 1.23        | European and Asian                  | Same                  |
|     |                                 |                                | rs1374910      | rs1374910                                 | T  | 0.088                | 0.078                   | 0.083 | 1.15 | 0.053 | 7.6E-03 | rs1374910      | rs1374910                                 | T  | 1.24        | Hispanics and European              | Same                  |
|     |                                 |                                | rs9465871      | rs9465871                                 | C  | 0.495                | 0.471                   | 0.481 | 1.09 | 0.029 | 3.1E-03 | rs9465871      | rs9465871                                 | C  | 1.18        | European                            | Same                  |
|     |                                 |                                | rs9295474      | rs9295474                                 | G  | 0.402                | 0.374                   | 0.386 | 1.11 | 0.030 | 3.7E-04 | rs9295474      | rs9295474                                 | G  | 1.16        | Asian                               | Same                  |
|     |                                 |                                | rs7766070      | rs9368222                                 | A  | 0.381                | 0.350                   | 0.363 | 1.13 | 0.030 | 4.0E-05 | rs7766070      | rs9368222                                 | A  | 1.21        | European                            | Same                  |
|     |                                 |                                | rs7756992      | rs7756992                                 | G  | 0.486                | 0.462                   | 0.471 | 1.09 | 0.029 | 3.6E-03 | rs7756992      | rs7756992                                 | G  | 1.20        | European                            | Same                  |
| 6   | CDKAL1                          | Yes                            | rs7754840      | rs9460546                                 | C  | 0.390                | 0.362                   | 0.374 | 1.11 | 0.030 | 6.3E-04 | rs7754840      | rs9460546                                 | C  | 1.12        | European                            | Same                  |
|     |                                 |                                | rs6931514      | rs6931514                                 | NA | NA                   | NA                      | NA    | NA   | NA    | NA      | rs6931514      | rs6931514                                 | G  | 1.25        | European                            | NA                    |
|     |                                 |                                | rs4712524      | rs4712523                                 | G  | 0.401                | 0.373                   | 0.385 | 1.11 | 0.030 | 4.3E-04 | rs4712524      | rs4712523                                 | G  | 1.22        | European and Asian                  | Same                  |
|     |                                 |                                | rs4712523      | rs4712523                                 | G  | 0.401                | 0.373                   | 0.385 | 1.11 | 0.030 | 4.3E-04 | rs4712523      | rs4712523                                 | G  | 1.20        | European, Japanese                  | Same                  |
|     |                                 |                                | rs10946398     | rs9460546                                 | C  | 0.390                | 0.362                   | 0.374 | 1.11 | 0.030 | 6.3E-04 | rs10946398     | rs9460546                                 | C  | 1.18        | European                            | Same                  |
|     |                                 |                                | rs1040833      | rs9368222                                 | A  | 0.381                | 0.350                   | 0.363 | 1.13 | 0.030 | 4.0E-05 | rs1040833      | rs9368222                                 | A  | 1.25        | European                            | Same                  |
|     |                                 |                                | rs13266634     | rs13266634                                | C  | 0.079                | 0.080                   | 0.079 | 0.97 | 0.055 | 6.1E-01 | rs13266634     | rs13266634                                | C  | 1.16        | European and Japanese               | Different             |
| 8   | SLC30A8                         | Yes                            | rs3802177      | rs3802177                                 | T  | 0.431                | 0.459                   | 0.446 | 0.90 | 0.029 | 3.2E-04 | rs3802177      | rs3802177                                 | G  | 1.23        | European                            | Same                  |
|     |                                 |                                | rs7034200      | rs7034200                                 | A  | 0.460                | 0.444                   | 0.452 | 1.07 | 0.029 | 2.5E-02 | rs7034200      | rs7034200                                 | A  | 1.03        | European                            | Same                  |
| 9   | GLIS3                           | Yes                            | rs7041847      | rs7041847                                 | A  | 0.481                | 0.468                   | 0.475 | 1.06 | 0.029 | 5.8E-02 | rs7041847      | rs7041847                                 | A  | 1.10        | Asians                              | Same                  |
|     |                                 |                                | rs10811661     | rs10811661                                | C  | 0.388                | 0.425                   | 0.408 | 0.85 | 0.030 | 5.0E-08 | rs10811661     | rs10811661                                | T  | 1.19        | European                            | Same                  |
|     |                                 |                                | rs10965250     | rs10811661                                | C  | 0.388                | 0.425                   | 0.408 | 0.85 | 0.030 | 5.0E-08 | rs10965250     | rs10811661                                | G  | 1.20        | European                            | Same                  |
| 9   | CDKN2A/B-CDKN2BAS               | Yes                            | rs2383208      | rs2383208                                 | G  | 0.375                | 0.404                   | 0.391 | 0.88 | 0.030 | 1.3E-05 | rs2383208      | rs2383208                                 | A  | 1.34        | Japanese                            | Same                  |
|     |                                 |                                | rs7020996      | rs7020996                                 | T  | 0.375                | 0.403                   | 0.390 | 0.88 | 0.030 | 3.8E-05 | rs7020996      | rs7020996                                 | C  | 1.26        | European                            | Same                  |
|     |                                 |                                | rs564398       | rs564398                                  | G  | 0.106                | 0.103                   | 0.104 | 1.03 | 0.048 | 5.6E-01 | rs564398       | rs564398                                  | T  | 1.13        | European                            | Different             |
|     |                                 |                                | rs7018475      | rs7018475**                               | G  | 0.355                | 0.348                   | 0.352 | 1.03 | 0.031 | 3.1E-01 | rs7018475      | rs7018475**                               | G  | 0.74        | European                            | Different             |
| 10  | CDC123/CAMK1D                   | Yes                            | rs10906115     | rs10906115                                | G  | 0.358                | 0.390                   | 0.373 | 0.87 | 0.030 | 1.1E-05 | rs10906115     | rs10906115                                | A  | 1.13        | European and Asian                  | Same                  |
|     |                                 |                                | rs12779790     | rs11257655                                | NA | 0.413                | 0.448                   | 0.430 | NA   | 0.030 | 2.3E-06 | rs12779790     | rs11257655                                | G  | 1.11        | European                            | no proxy or NA        |
|     |                                 |                                | rs1118775      | rs1118775                                 | G  | 0.324                | 0.299                   | 0.311 | 1.13 | 0.032 | 1.6E-04 | rs1118775      | rs1118775                                 | C  | 1.21        | European and Japanese               | Same/Different        |
|     |                                 |                                | rs6583826      | rs6583826**                               | G  | 0.255                | 0.237                   | 0.245 | 1.10 | 0.034 | 4.1E-03 | rs6583826      | rs6583826**                               | G  | 1.18        | Asian                               | Same                  |
|     |                                 |                                | rs5015480      | rs1111875                                 | G  | 0.324                | 0.299                   | 0.311 | 1.13 | 0.032 | 1.6E-04 | rs5015480      | rs1111875                                 | C  | 1.18        | European and Japanese               | Same                  |
|     |                                 |                                | rs2237897      | rs2237897                                 | T  | 0.313                | 0.360                   | 0.338 | 0.80 | 0.032 | 5.7E-12 | rs2237897      | rs2237897                                 | C  | 1.33        | European and Asian                  | Same                  |
|     |                                 |                                | rs2237892      | rs7480855                                 | G  | 0.346                | 0.382                   | 0.365 | 0.86 | 0.031 | 5.4E-07 | rs2237892      | rs7480855                                 | C  | 1.20        | European and Asian                  | Same                  |
|     |                                 |                                | rs163182       | rs163182**                                | C  | 0.399                | 0.358                   | 0.378 | 1.20 | 0.030 | 3.7E-09 | rs163182       | rs163182**                                | C  | 1.28        | Chinese                             | Same                  |
|     |                                 |                                | rs2237895      | rs2237895**                               | C  | 0.378                | 0.335                   | 0.356 | 1.23 | 0.031 | 6.5E-11 | rs2237895      | rs2237895**                               | C  | 1.29        | Chinese                             | Same                  |
|     |                                 |                                | rs2283228      | rs2283228                                 | C  | 0.332                | 0.369                   | 0.352 | 0.85 | 0.031 | 1.6E-07 | rs2283228      | rs2283228                                 | A  | 1.26        | European and Asian                  | Same                  |
|     |                                 |                                | rs231362       | rs231362                                  | NA | NA                   | NA                      | NA    | NA   | NA    | NA      | rs231362**     | rs231362**                                | G  | 1.08        | European                            | no proxy or NA        |
|     |                                 |                                | rs5219         | rs5219                                    | T  | 0.392                | 0.358                   | 0.375 | 1.15 | 0.030 | 4.2E-06 | rs5219         | rs5219                                    | T  | 1.25        | European                            | Same                  |
|     |                                 |                                | rs5215         | rs5215                                    | C  | 0.392                | 0.358                   | 0.375 | 1.15 | 0.030 | 3.8E-06 | rs5215         | rs5215                                    | C  | 1.16        | European                            | Same                  |
| 15  | PRC1                            | Yes                            | rs8042680      | rs8042680**                               | NA | NA                   | NA                      | NA    | NA   | NA    | NA      | rs8042680      | rs8042680**                               | A  | 1.07        | European                            | no proxy or NA        |
|     |                                 |                                | rs757210       | rs757210                                  | T  | 0.277                | 0.249                   | 0.262 | 1.14 | 0.033 | 5.8E-05 | rs757210       | rs757210                                  | A  | 1.10        | European                            | Same                  |
| 17  | HNF1B (TCF2)                    | Yes                            | rs4430796      | rs4239217                                 | G  | 0.300                | 0.273                   | 0.286 | 1.14 | 0.033 | 7.5E-05 | rs4430796      | rs4239217                                 | G  | 1.14        | European                            | Same                  |
| 1   | NOTCH2                          | No (P=0.114)                   | rs10923931     | rs10923931                                | T  | 0.027                | 0.026                   | 0.027 | 1.04 | 0.091 | 6.4E-01 | rs10923931     | rs10923931                                | T  | 1.13        | European                            | Same                  |
| 1   | PROX1                           | No (P=0.004) †                 | rs340874       | rs340874                                  | G  | 0.397                | 0.376                   | 0.386 | 1.09 | 0.030 | 3.6E-03 | rs340874       | rs340874                                  | C  | 1.07        | European                            | Different             |
| 2   | THADA                           | No (P=0.021) †                 | rs7578597      | rs7578597**                               | NA | NA                   | NA                      | NA    | NA   | NA    | NA      | rs7578597      | rs7578597**                               | T  | 1.15        | European                            | no proxy or NA        |
| 2   | BCL11A                          | No (P=0.020) †                 | rs243021       | rs243083                                  | T  | 0.336                | 0.349                   | 0.342 | 0.95 | 0.031 | 1.1E-01 | rs243021       | rs243083                                  | A  | 1.08        | European                            | Different             |
| 2   | RBMS1/ITGB6                     | No (P=0.001) †                 | rs7593730      | rs4410242                                 | A  | 0.173                | 0.163                   | 0.168 | 1.08 | 0.040 | 5.5E-02 | rs7593730      | rs4410242                                 | A  | 1.11        | European                            | Same                  |
| 2   | GSPC2/ABCB1                     | No (P=0.014) †                 | rs563694       | rs563694                                  | C  | 0.042                | 0.040                   | 0.041 | 1.05 | 0.074 | 5.1E-01 | rs563694       | rs563694                                  | A  | NR          | Chinese                             | NA                    |
|     |                                 |                                | rs560887       | rs573225                                  | C  | 0.061                | 0.056                   | 0.058 | 1.08 | 0.061 | 2.2E-01 | rs560887       | rs573225                                  | C  | 0.70 (Beta) | European                            | Same                  |
|     |                                 |                                | rs1801282      | rs2197423                                 | T  | 0.040                | 0.047                   | 0.044 | 0.84 | 0.073 | 1.6E-02 | rs1801282      | rs2197423                                 | C  | 1.14        | European                            | Same                  |
| 3   | PPARG                           | No (P=0.006) †                 | rs17036101     | rs17036101                                | A  | 0.036                | 0.042                   | 0.039 | 0.83 | 0.077 | 1.9E-02 | rs17036101     | rs17036101                                | G  | 1.15        | European                            | Same                  |
|     |                                 |                                | rs13081389     | rs13081389                                | G  | 0.036                | 0.042                   | 0.039 | 0.83 | 0.077 | 1.7E-02 | rs13081389     | rs13081389                                | A  | 1.24        | European                            | Same                  |
| 3   | ADAMTS9/ADAMTS9-AS2 (LOC730057) | No (P=0.040) †                 | rs4607103      | rs4607103                                 | T  | 0.346                | 0.348                   | 0.346 | 0.99 | 0.031 | 7.5E-01 | rs4607103      | rs4607103                                 | C  | 1.09        | European                            | Same                  |
| 3   | ADCY5                           | No (P=0.015) †                 | rs11708067     | rs11708067                                | NA | NA                   | NA                      | NA    | NA   | NA    | NA      | rs11708067     | rs11708067                                | A  | 1.25        | European                            | no proxy or NA        |
|     |                                 |                                | rs2877716      | rs2877716                                 | NA | NA                   | NA                      | NA    | NA   | NA    | NA      | rs2877716      | rs2877716                                 | C  | 0.09        | European                            | no proxy or NA        |
| 3   | SLC2A2                          | No (P=0.054)                   | rs11920090     | rs11924648                                | NA | NA                   | NA                      | NA    | NA   | NA    | NA      | rs11920090     | rs11924648                                | T  | NR          | European                            | no proxy or NA        |
| 4   | WFS1                            | No (P=0.106)                   | rs1801214      | rs1801214                                 | C  | 0.055                | 0.060                   | 0.057 | 0.93 | 0.063 | 2.7E-01 | rs1801214      | rs1801214                                 | T  | 1.13        | European                            | Same                  |
|     |                                 |                                | rs4689388      | rs4689388                                 | G  | 0.051                | 0.058                   | 0.055 | 0.90 | 0.065 | 1.1E-01 | rs4689388      | rs4689388                                 | T  | 1.16        | European                            | Same                  |
|     |                                 |                                | rs10011031     | rs10012946                                | T  | 0.062                | 0.068                   | 0.065 | 0.93 | 0.060 | 2.1E-01 | rs10011031     | rs10012946                                | T  | 0.90        | European                            | Same                  |
| 5   | ZBED3/ZBED3-AS1 (LOC728723)     | No (P=0.019) †                 | rs4457053      | rs4457053                                 | G  | 0.060                | 0.053                   | 0.057 | 1.15 | 0.063 | 2.7E-02 | rs4457053      | rs4457053                                 | G  | 1.08        | European                            | Same                  |
| 7   | DGKB-TMEM195                    | No (P=0.005) †                 | rs2191349      | rs2191349                                 | G  | 0.311                | 0.315                   | 0.313 | 0.97 | 0.032 | 3.2E-01 | rs2191349      | rs2191349                                 | T  | 1.06        | European                            | Same                  |
|     |                                 |                                | rs864745       | rs1635852                                 | C  | 0.217                | 0.223                   | 0.219 | 0.96 | 0.035 | 2.2E-01 | rs864745       | rs1635852                                 | T  | 1.10        | European                            | Same                  |
|     |                                 |                                | rs849134       | rs1635852                                 | C  | 0.217                | 0.223                   | 0.219 | 0.96 | 0.035 | 2.2E-01 | rs849134       | rs1635852                                 | A  | 1.13        | European                            | Same                  |
| 7   | GCK                             | No (P=0.104)                   | rs4607517      | rs2908282                                 | A  |                      |                         |       |      |       |         |                |                                           |    |             |                                     |                       |
