# Supplementary material for: Trans-ethnic fine mapping identifies a novel independent locus at the 3′ end of CDKAL1 and novel variants of several susceptibility loci for type 2 diabetes in a Han Chinese population
Source: Springer Nature journal article supplement (doi:10.1007/s00125-013-3047-1), 2013-09-07
Supplement: MOESM11 [file 8091856]

**ESM Table S4. Conditional Analysis of top 5 Loci with prior known European SNPs**

| <b>Locus</b>             | <b>Chr</b> | <b>Lead SNP</b>   | <b>A1</b> | <b>A2</b> | <b>MAF</b> | <b>OR</b> | <b>P-value *</b> | <b>OR.condition †</b> | <b>Pcondition †</b> |
|--------------------------|------------|-------------------|-----------|-----------|------------|-----------|------------------|-----------------------|---------------------|
| <i>GCKR</i>              | 2          | rs1260326         | T         | C         | 0.49       | 0.89      | 9.6E-05          |                       | NS                  |
| <i>IGF2BP2</i>           | 3          | rs6769511         | C         | T         | 0.26       | 1.17      | 5.0E-06          |                       | NS                  |
| <i>CDKN2A/B-CDKN2BAS</i> | 9          | rs10811661        | C         | T         | 0.41       | 0.85      | 5.0E-08          |                       | NS                  |
| <i>CDC123/CAMK1D</i>     | 10         | rs11257655        | C         | T         | 0.43       | 0.87      | 2.3E-06          |                       | NS                  |
| <i>KCNQ1</i>             | 11         | rs2237897         | T         | C         | 0.34       | 0.80      | 5.7E-12          |                       |                     |
|                          |            | <b>rs11024184</b> | A         | C         | 0.16       | 0.87      | 9.1E-04          | 0.80                  | 8.1E-08             |

\* Pvalue; adjusted for age, gender, PC1

† condition; adjusted for age, gender, PC1, and prior SNPs in the regression model

Lead SNP in **bold** indicates a novel SNP of the respective locus.

NS = Not significant (p<0.05) after a stepwise conditional analysis
