# Supplementary material for: Trans-ethnic fine mapping identifies a novel independent locus at the 3′ end of CDKAL1 and novel variants of several susceptibility loci for type 2 diabetes in a Han Chinese population
Source: Springer Nature journal article supplement (doi:10.1007/s00125-013-3047-1), 2013-09-07
Supplement: MOESM12 [file 8091856]

ESM Table S5. Conditional Analysis of top 9 Loci with putative novel SNPs

| Locus                 | Chr | Lead SNP          | A1 | A2 | MAF  | OR   | P.value * | Condition on European SNPs †                                                 | r2 (European)  | r2 (Asian)     | P.condition 1 (European SNPs) † | Condition on lead SNP ‡ | Novel SNP          | A1 | A2 | MAF  | OR   | P.value * | P.condition 1 (European SNPs) † | P.condition 2 (+lead SNP) ‡                  |
|-----------------------|-----|-------------------|----|----|------|------|-----------|------------------------------------------------------------------------------|----------------|----------------|---------------------------------|-------------------------|--------------------|----|----|------|------|-----------|---------------------------------|----------------------------------------------|
| <i>IRS1</i>           | 2   | rs2943632         | A  | G  | 0.08 | 0.82 | 1.8E-04   | rs7578326 or rs2943641                                                       | 0.782          | 0.070          | 0.09                            | rs2943632               | <b>rs2138157</b>   | T  | G  | 0.07 | 0.81 | 2.6E-04   | 2.8E-02                         | 0.03                                         |
| <i>UBE2E2</i>         | 3   | rs17012800 §      | G  | A  | 0.19 | 0.86 | 4.3E-05   | rs7612463 §                                                                  | 0.478          | 0.823          | NA §                            | rs17012800              | no additional SNPs |    |    |      |      |           |                                 |                                              |
| <i>CDKAL1</i>         | 6   | rs9356744         | C  | T  | 0.36 | 1.14 | 2.1E-05   | rs7756992, rs7754840, rs4712523, rs10946398, rs9465871, rs4712524, rs9295474 | 0.396 to 0.748 | 0.702 to 0.845 | 0.001 ~ 0.017                   | rs9356744               | <b>rs7773318</b>   | T  | C  | 0.32 | 1.13 | 8.4E-05   | 1.5E-04 ~ 3.3 E-04              | 3.0E-04                                      |
|                       |     |                   |    |    |      |      |           | rs9368222 (proxy for rs10440833)                                             | 0.843          | 1.000          | NS                              |                         | <b>rs9465994</b>   | A  | G  | 0.39 | 0.90 | 4.7E-04   | 1.7E-03 ~ 2.4 E-03              | 2.6E-03 (rs9356744)<br>4.1E-03 (+ rs7773318) |
| <i>SLC30A8</i>        | 8   | rs11774700        | C  | T  | 0.45 | 0.90 | 2.7E-04   | rs13266634                                                                   | 0.801          | 0.934          | 0.62                            | rs11774700              | no additional SNPs |    |    |      |      |           |                                 |                                              |
| <i>GLIS3</i>          | 9   | <b>rs12378556</b> | G  | A  | 0.38 | 1.11 | 4.0E-04   | rs7041847                                                                    | 0.121          | 0.521          | 2.4E-03                         | rs12378556              | <b>rs10974438</b>  | C  | A  | 0.38 | 1.11 | 7.2E-04   | 1.6E-03                         | 0.03                                         |
| <i>IDE/KIF11/HHEX</i> | 10  | <b>rs10882091</b> | C  | T  | 0.10 | 1.30 | 2.9E-05   | rs1111875                                                                    | 0.506          | 0.178          | 4.9E-03                         | rs10882091              | no additional SNPs |    |    |      |      |           |                                 |                                              |
| <i>KCNJ11/ABCC8</i>   | 11  | rs2074314         | G  | A  | 0.37 | 1.15 | 3.5E-06   | rs5215, rs5219                                                               | 0.837          | 0.962          | NS                              | rs2074314               | no additional SNPs |    |    |      |      |           |                                 |                                              |
| <i>PRC1</i>           | 15  | rs3743451 §       | T  | C  | 0.48 | 0.90 | 8.9E-04   | rs8042680 §                                                                  | 0.136          | NA             | NA §                            | rs3743451               | no additional SNPs |    |    |      |      |           |                                 |                                              |
| <i>HNF1B (TCF2)</i>   | 17  | rs8064454         | A  | C  | 0.28 | 1.16 | 1.3E-05   | rs757210                                                                     | 0.564          | 0.848          | 0.06                            | rs8064454               | no additional SNPs |    |    |      |      |           |                                 |                                              |

\* P.value; adjusted for age, gender, PC1.

† P.condition 1; adjusted for age, gender, PC1, and prior Caucasian SNPs (†)

‡ P.condition 2; adjusted for age, gender, PC1, and novel SNPs (‡) to see if there are additional significant independent SNPs in the locus.

§, SNPs not on the MetaboChip but available proxy; §, SNPs not on the MetaboChip and no available proxy.

||, SNPs not on the MetaboChip but available proxy; ||, plus. SNP in **bold** indicates a novel SNP of the respective locus.

Alpha for conditional analysis set at P<0.05
