# Supplementary material for: Trans-ethnic fine mapping identifies a novel independent locus at the 3′ end of CDKAL1 and novel variants of several susceptibility loci for type 2 diabetes in a Han Chinese population
Source: Springer Nature journal article supplement (doi:10.1007/s00125-013-3047-1), 2013-09-07
Supplement: MOESM13 [file 8091856]

## Electronic supplementary material (ESM)

### ESM Text

#### The TaiChi consortium

1. **HALST (Healthy Aging Longitudinal Study in Taiwan)** is a population based epidemiologic study of older adults living in all major geographic regions of Taiwan and is established by the Taiwan National Health Research Institutes (NHRI).
2. **SAPPHIRE (Stanford-Asian Pacific Program in Hypertension and Insulin Resistance)** is a family based study established in 1995 with an initial goal of identifying major genetic loci underlying hypertension and insulin resistance in East Asian populations. Participants were recruited from San Francisco, Hawaii, and Taiwan. Only Taiwan samples participated in the TaiChi consortium.
3. **TCAGEN (Taiwan Coronary Artery Disease GENetic)** study is an ongoing cohort study that has been enrolling patients undergoing coronary angiography or percutaneous intervention at the National Taiwan University Hospital (NTUH) in the setting of either stable angina pectoris or prior myocardial infarction.
4. **TACT (TAiwan Coronary and Transcatheter intervention)** cohort study enrolled patients with angina pectoris and objective documentation of myocardial ischemia who underwent diagnostic coronary angiography and/or revascularization any time after October 2000 at the National Taiwan University Hospital (NTUH). This cohort is very similar to TCAGEN but recruitment was independent of TCAGEN.
5. **Taiwan DRAGON (Taiwan Diabetes and RelAted Genetic COMplication)** study is a cohort study with Type 2 diabetes at Taichung Veterans General Hospital (Taichung VGH) in Taiwan. Participants include individuals with either newly diagnosed or established diabetes; subjects with hyperglycemia who do not meet diagnostic criteria for Type 2 DM are not included.
6. **TCAD (Taichung CAD study)** includes patients with a variety of cardiovascular diseases receiving care at the Taichung Veterans General Hospital (Taichung VGH). Specifically, individuals who were hospitalized for diagnostic and interventional coronary angiography examinations and treatment are included in TaiChi.
7. **TUDR (Taiwan US Diabetic Retinopathy)** is a cohort that enrolled subjects with Type 2 diabetes receiving care at Taichung Veteran General Hospital (Taichung VGH), and a small number of subjects from Taipei Tri-Service General Hospital. All TUDR subjects underwent a complete ophthalmic and fundus examination to carefully document the presence and extent of retinopathy.
