# Supplementary figures and images for: Trans-ethnic fine mapping identifies a novel independent locus at the 3′ end of CDKAL1 and novel variants of several susceptibility loci for type 2 diabetes in a Han Chinese population
Source: Springer Nature journal article supplement (doi:10.1007/s00125-013-3047-1), 2013-09-07

ESM Fig. 1

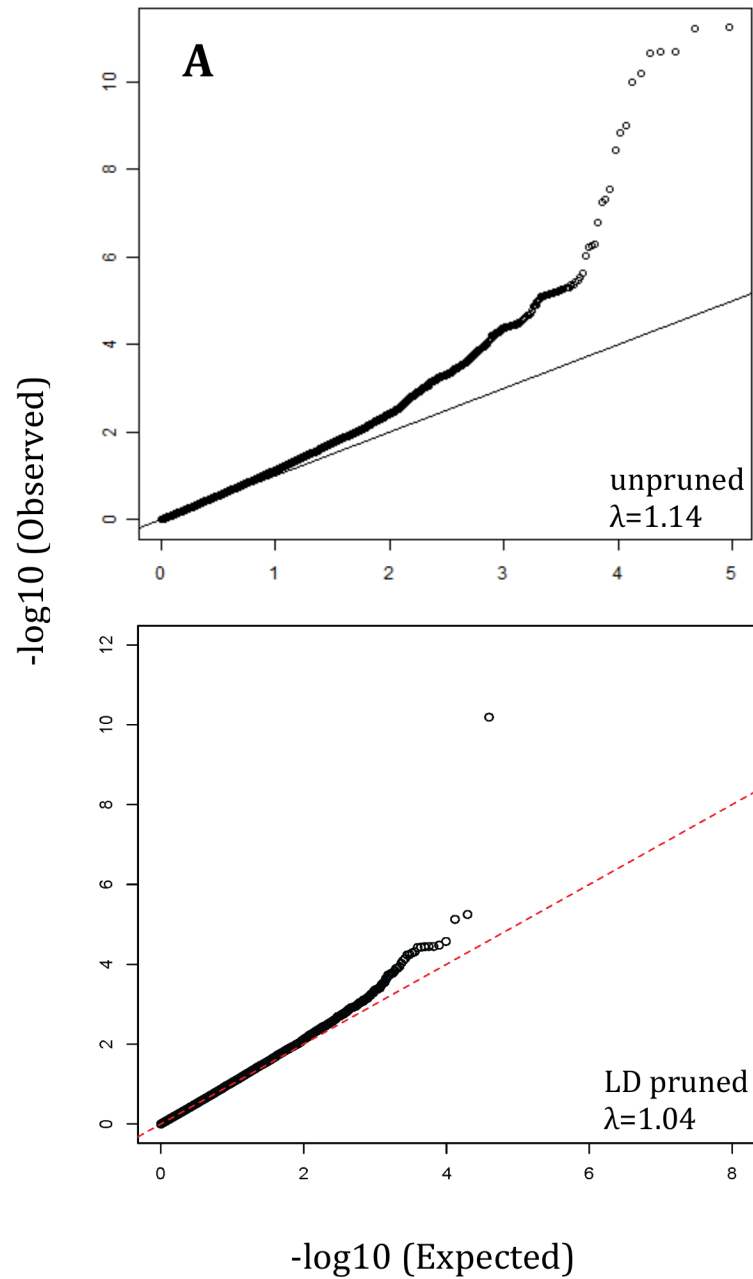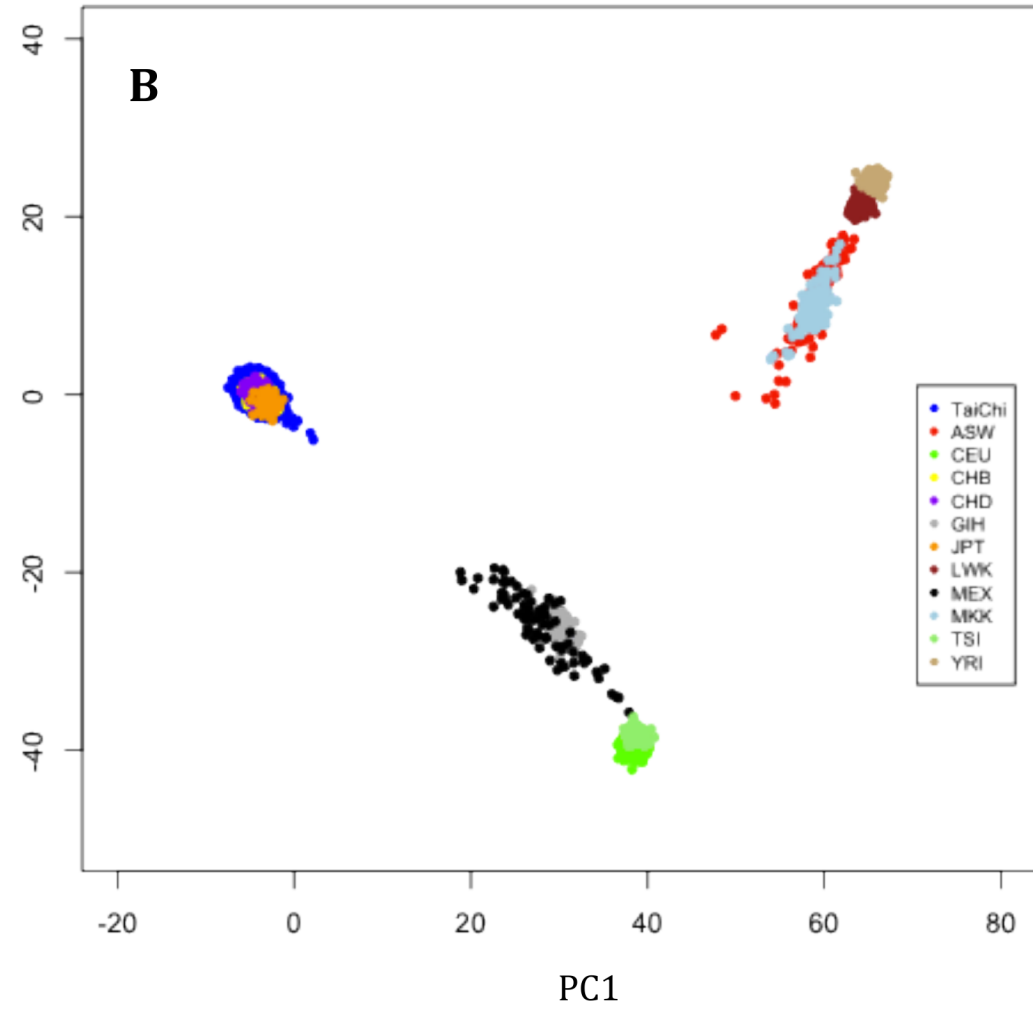

Supplement: MOESM1 [file 8091856]

# Regional association plots of T2D loci with known lead SNPs

ESM Fig. 2

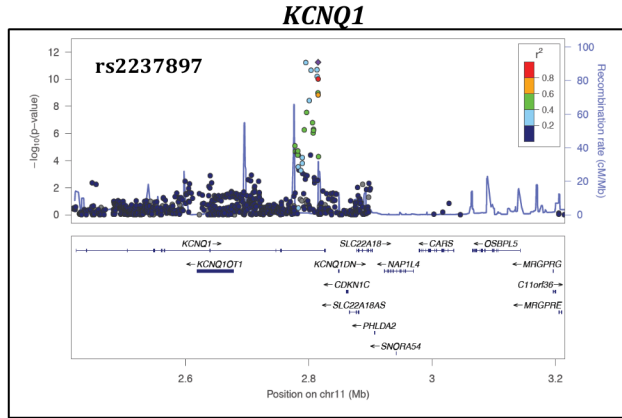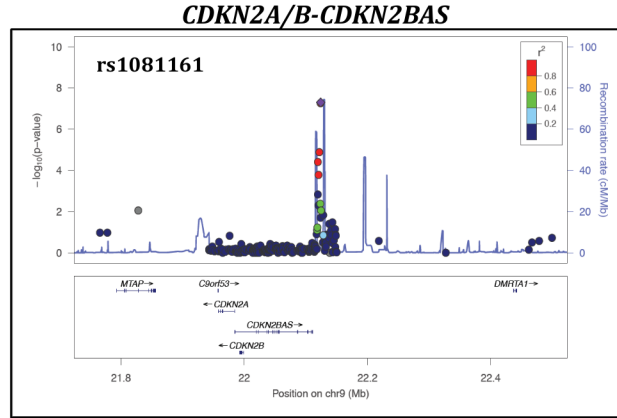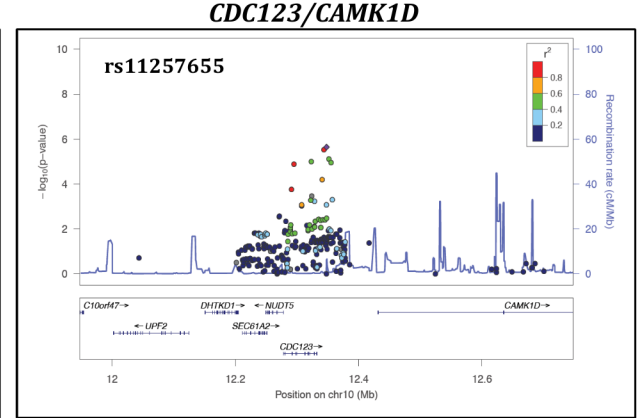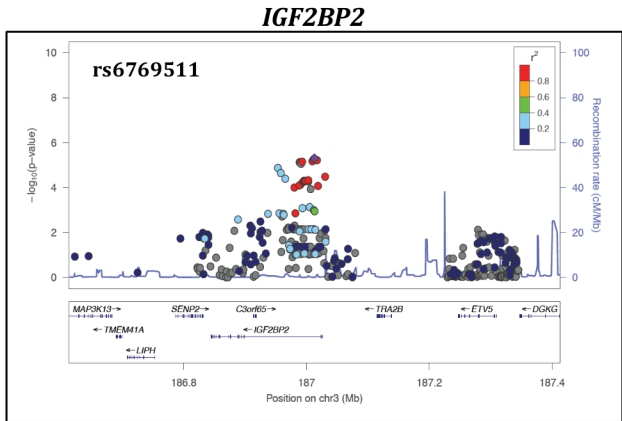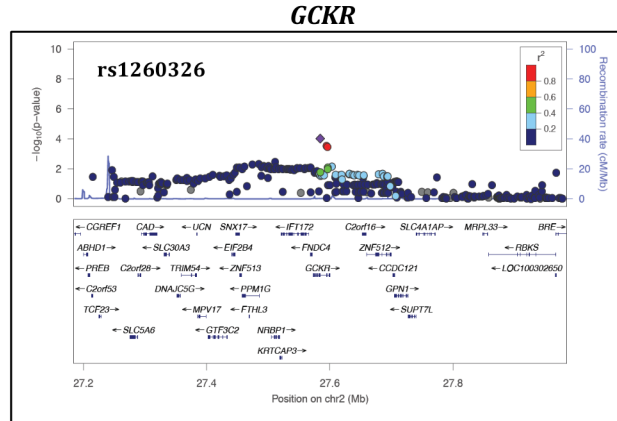

Supplement: MOESM2 [file 8091856]

# KCNQ1

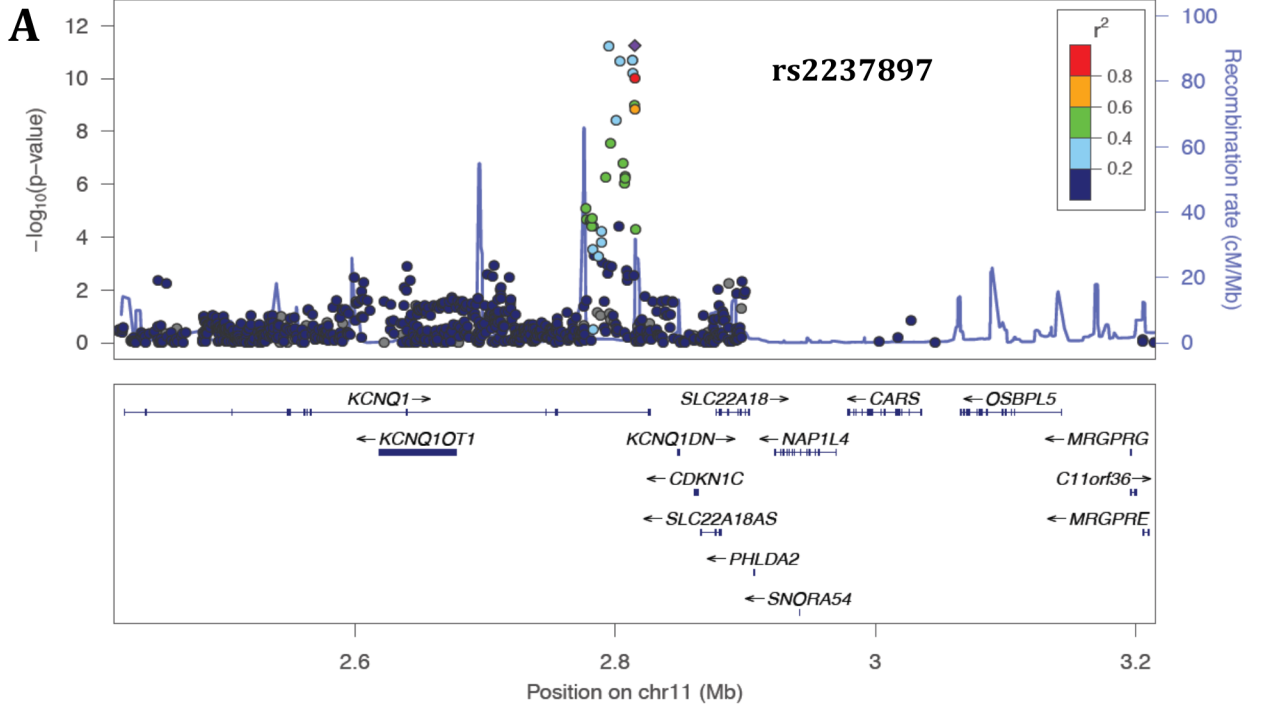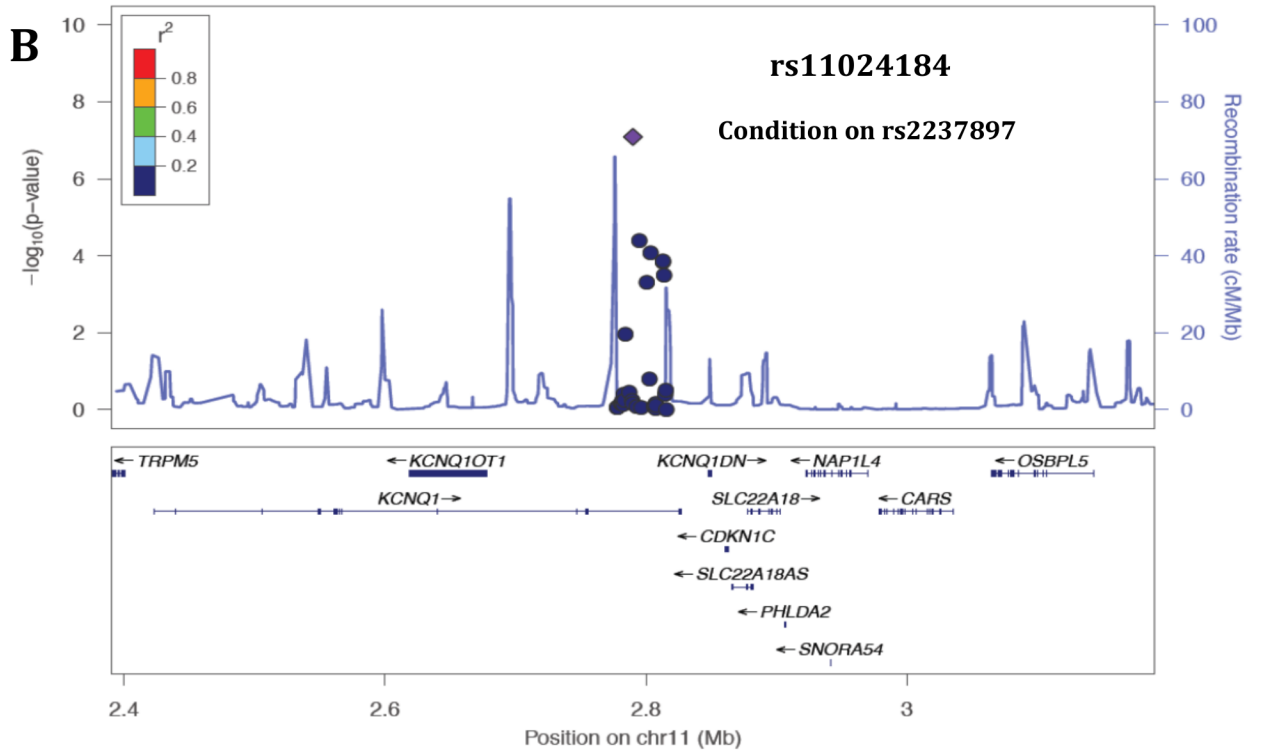

Supplement: MOESM3 [file 8091856]

ESM Fig. 4

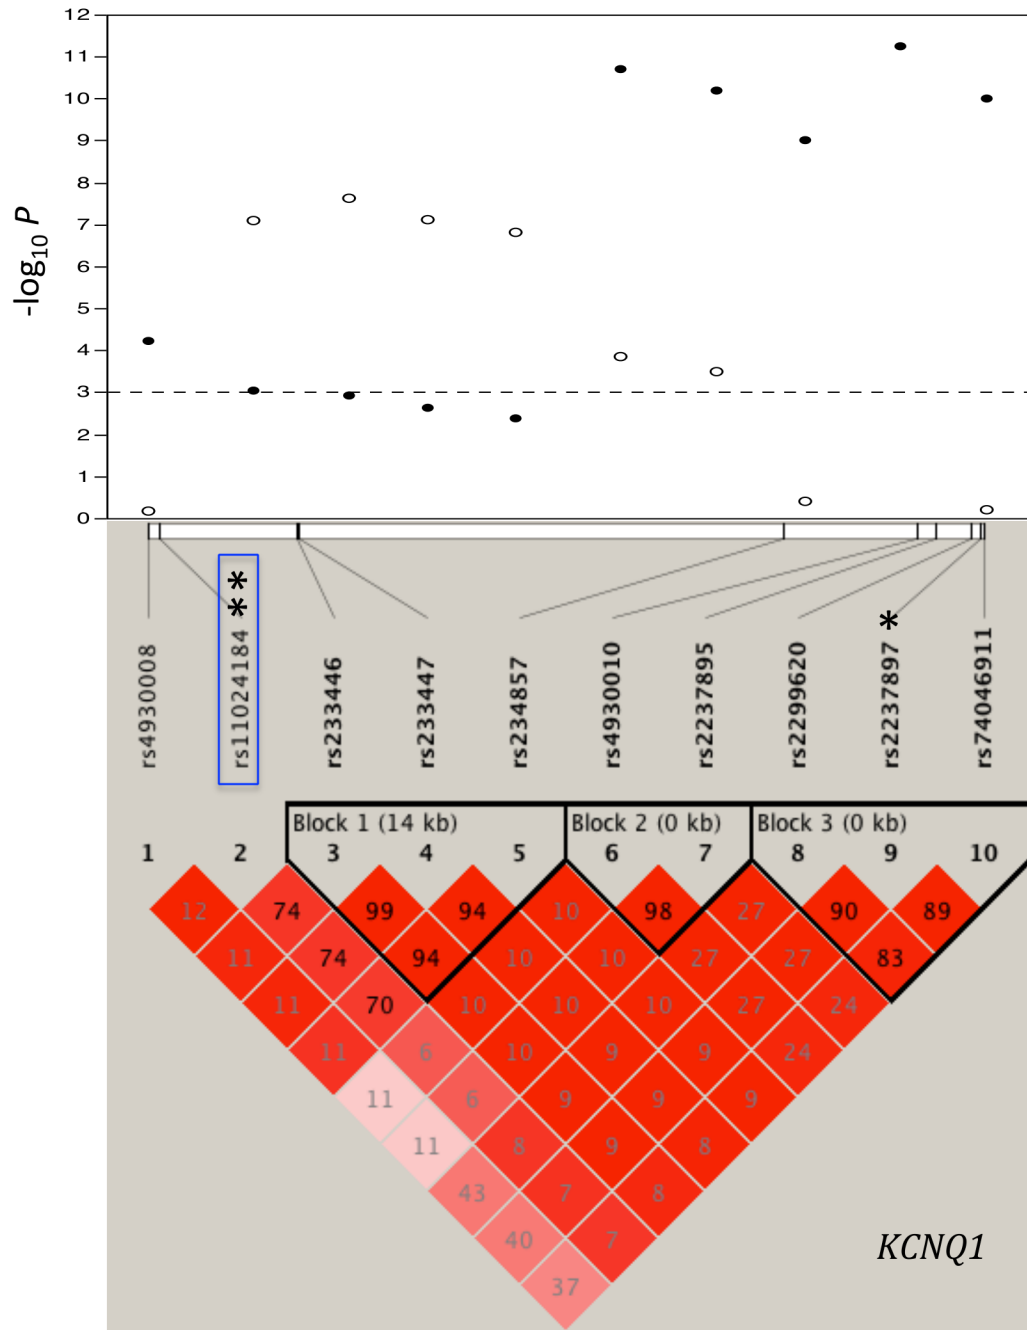

Supplement: MOESM4 [file 8091856]

*KCNJ11/ABCC8*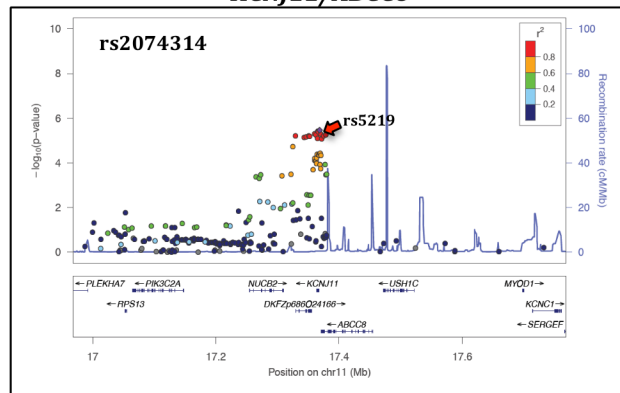*HNF1B(TCF2)*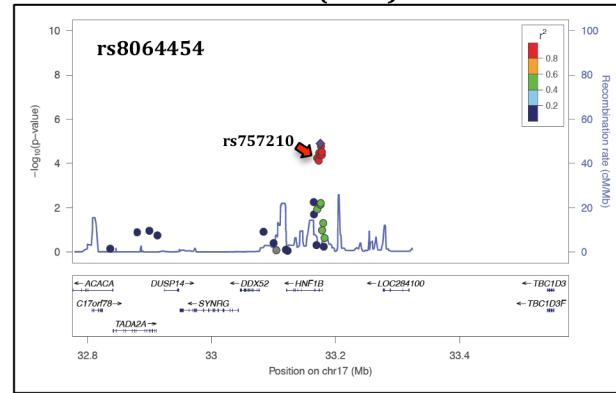*CDKAL1*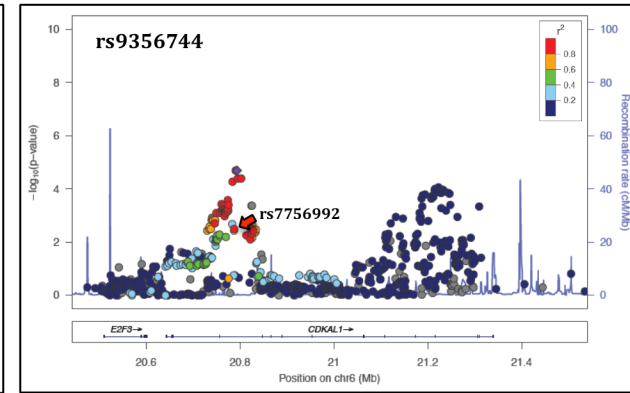*IDE/KIF11/HHEX*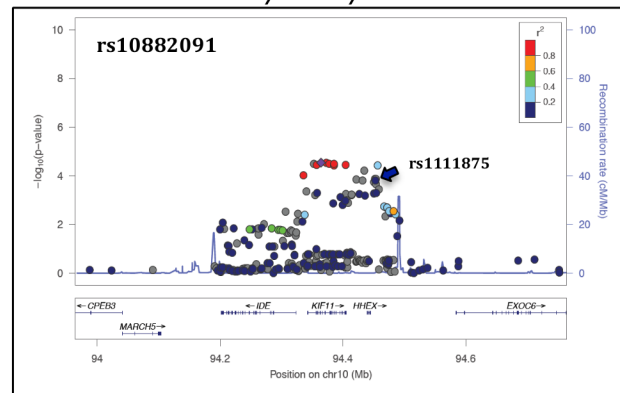*UBE2E2*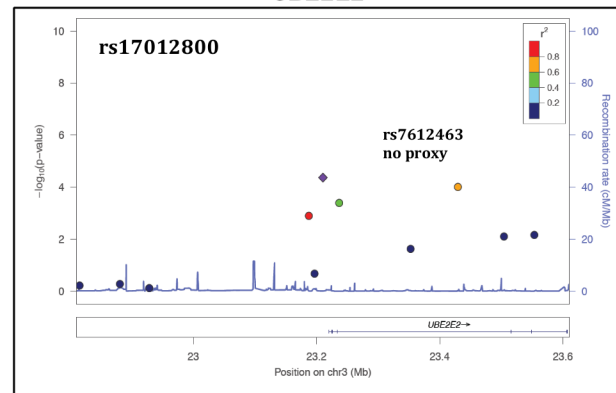*IRS1*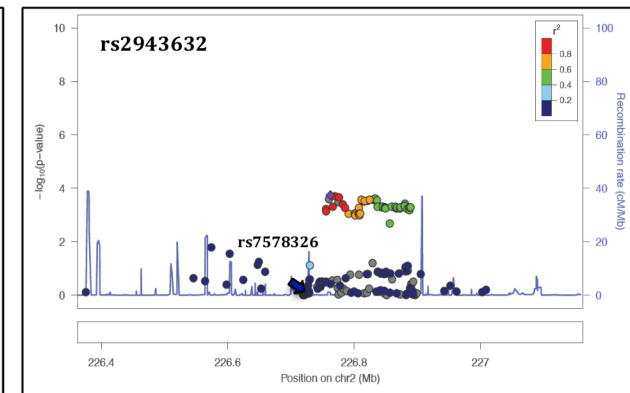*SLC30A8*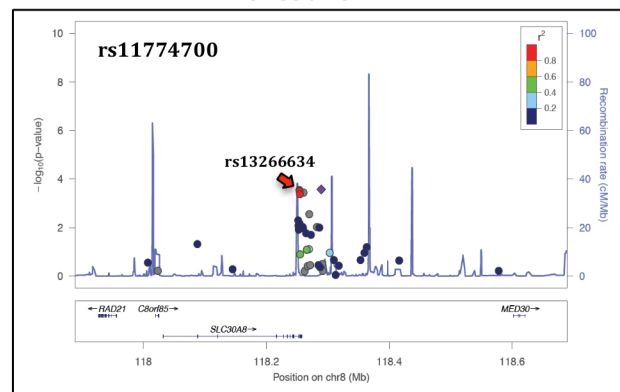*GLIS3*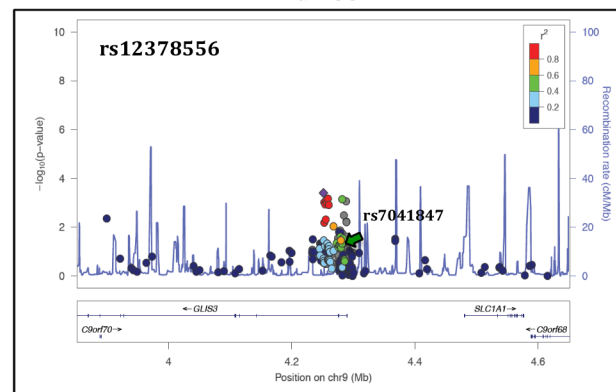*PRC1*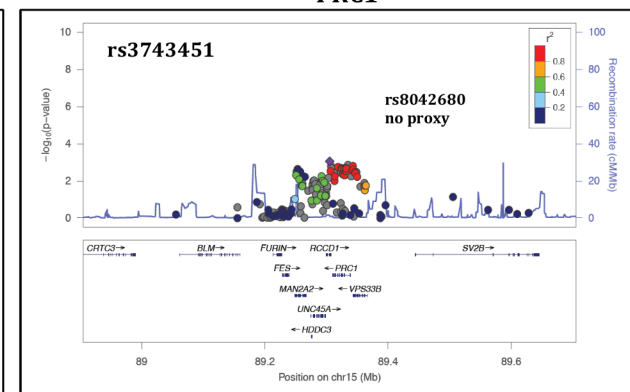

Supplement: MOESM5 [file 8091856]

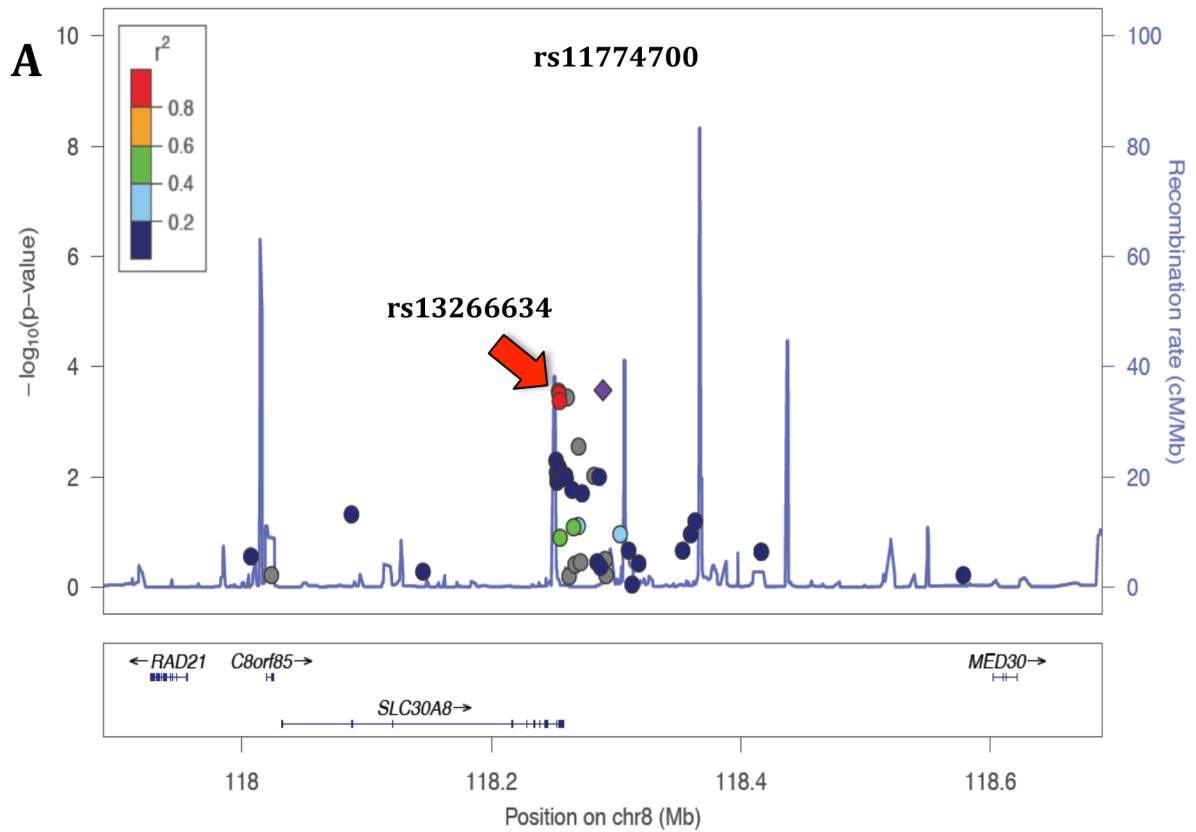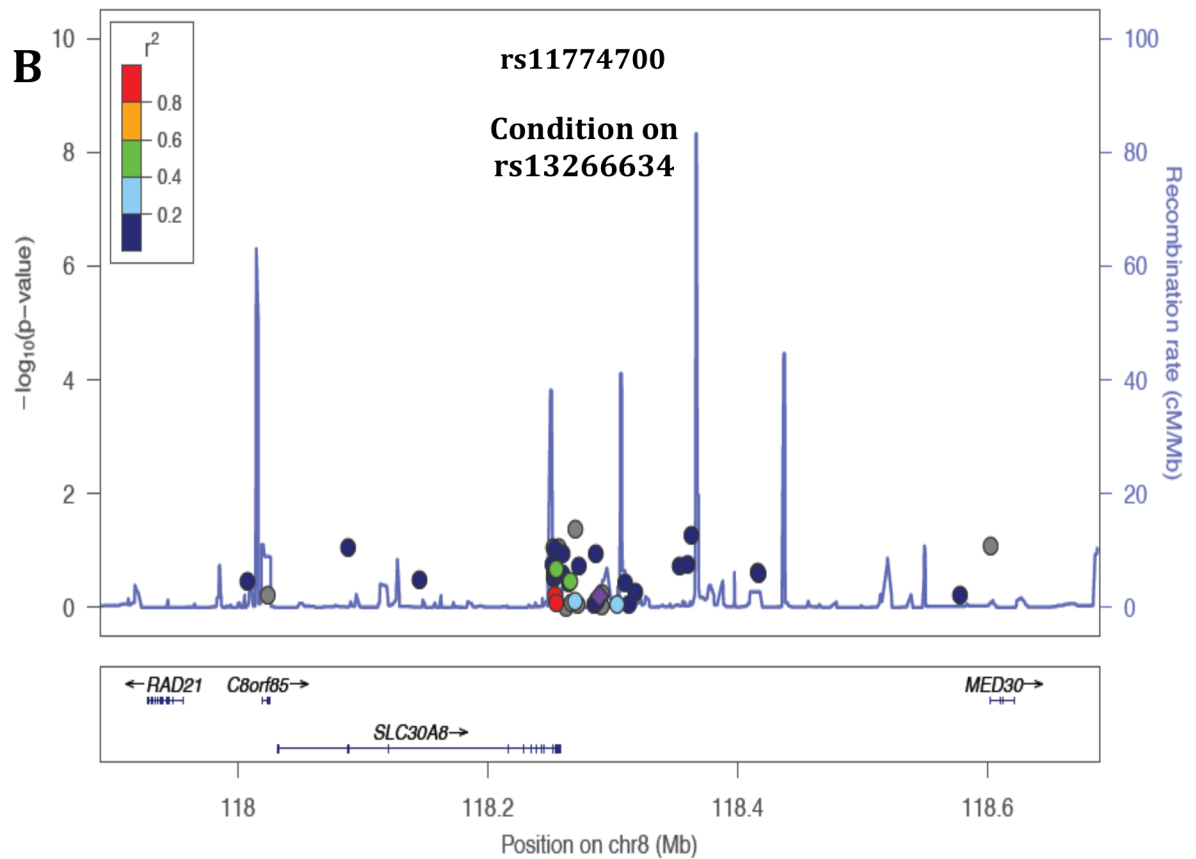

Supplement: MOESM6 [file 8091856]

ESM Fig. 7

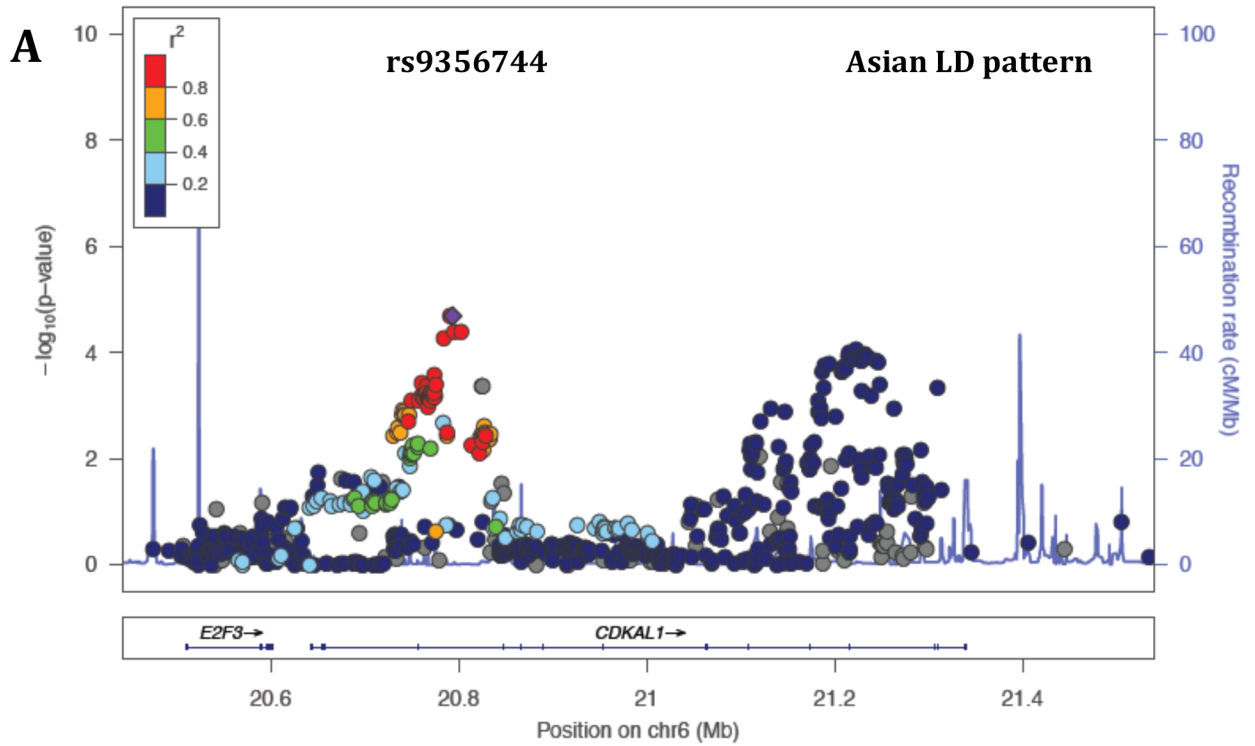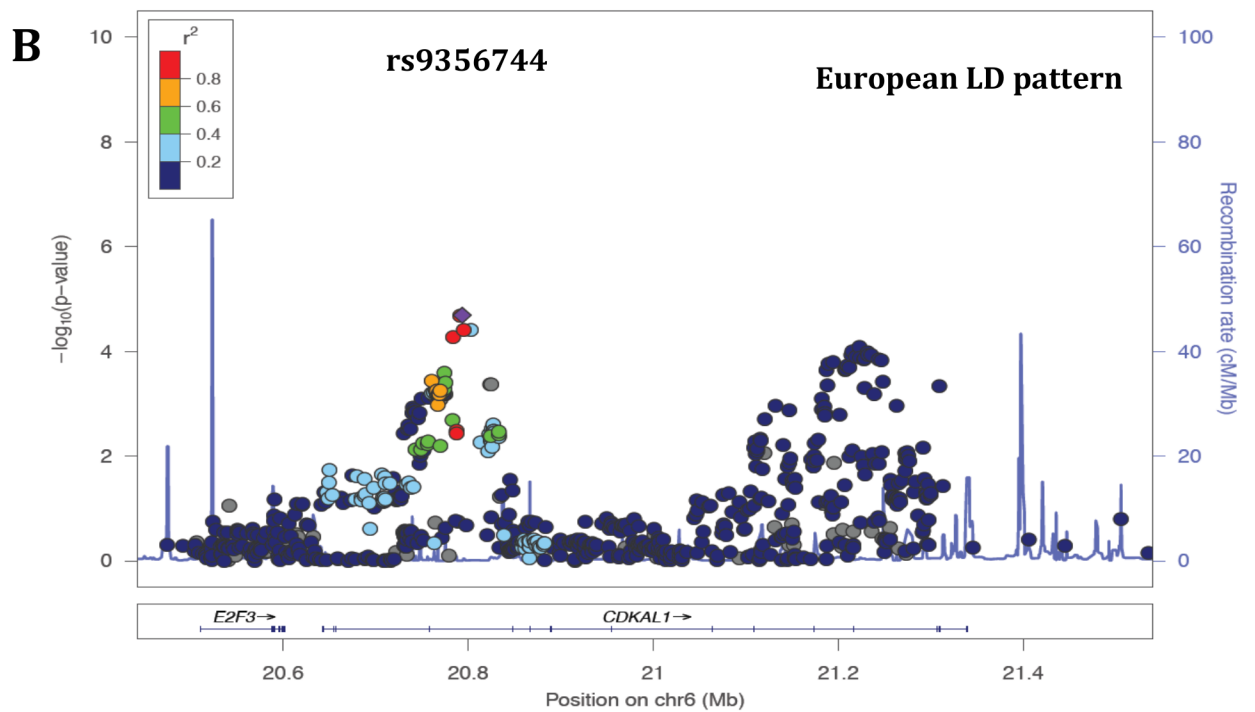

Supplement: MOESM7 [file 8091856]
